# Supplementary material for: Effects of cilostazol against the progression of carotid IMT in symptomatic ischemic stroke patients
Source: Springer Nature journal article supplement (doi:10.1007/s00415-012-6599-y), 2012-07-20

**Supplementary Table 1** Antiplatelet treatment regimen in cilostazol and control groups

|                         | Cilostazol (N=101) | Control (n=107) | P value* |
|-------------------------|--------------------|-----------------|----------|
| Cilostazol only         | 14 (13.9%)         | 0 (0.0%)        | <0.001   |
| Aspirin                 | 35 (34.7%)         | 22 (20.6%)      | 0.023    |
| Triflusal               | 18 (17.8%)         | 13 (12.1%)      | 0.251    |
| Clopidogrel             | 27 (26.7%)         | 31 (29.0%)      | 0.719    |
| Aspirin + Clopidogrel   | 6 (5.9%)           | 20 (18.7%)      | 0.005    |
| Triflusal + Clopidogrel | 1 (1.0%)           | 3 (2.8%)        | 0.622†   |
| Aspirin + Triflusal     | 0 (0.0%)           | 18 (16.8%)      | <0.001   |

\* P-values are for Chi-squared test unless indicated.

† P-value is for Fisher's exact test.

**Supplementary Table 2** Changes in mean and maximum CCA-IMT values between baseline and follow-up

|                       | Cilostazol 100mg/d |        | Control |        | P-value <sup>†</sup> | Cilostazol 200mg/d |        | P-value <sup>†</sup> |
|-----------------------|--------------------|--------|---------|--------|----------------------|--------------------|--------|----------------------|
|                       | (n=29)             |        | (n=107) |        |                      | (n=72)             |        |                      |
| Left maximum CCA-IMT  |                    |        |         |        |                      |                    |        |                      |
| Baseline              | 1.065              | ±0.373 | 1.101   | ±0.410 |                      | 1.121              | ±0.386 |                      |
| Follow-up             | 1.049              | ±0.434 | 1.122   | ±0.447 |                      | 1.060              | ±0.382 |                      |
| Mean change           | -0.016             | ±0.174 | 0.022   | ±0.163 | 0.440                | -0.061             | ±0.190 | 0.001                |
| Left mean CCA-IMT     |                    |        |         |        |                      |                    |        |                      |
| Baseline              | 0.842              | ±0.238 | 0.855   | ±0.242 |                      | 0.871              | ±0.230 |                      |
| Follow-up             | 0.803              | ±0.211 | 0.879   | ±0.278 |                      | 0.813              | ±0.225 |                      |
| Mean change           | -0.038             | ±0.065 | 0.023   | ±0.112 | 0.013                | -0.058             | ±0.113 | <0.001               |
| Right maximum CCA-IMT |                    |        |         |        |                      |                    |        |                      |
| Baseline              | 0.974              | ±0.383 | 1.053   | ±0.405 |                      | 1.018              | ±0.336 |                      |
| Follow-up             | 0.989              | ±0.344 | 1.103   | ±0.489 |                      | 0.960              | ±0.302 |                      |
| Mean change           | 0.015              | ±0.154 | 0.050   | ±0.200 | 0.365                | -0.057             | ±0.177 | 0.004                |
| Right mean CCA-IMT    |                    |        |         |        |                      |                    |        |                      |
| Baseline              | 0.778              | ±0.199 | 0.822   | ±0.229 |                      | 0.810              | ±0.209 |                      |
| Follow-up             | 0.784              | ±0.195 | 0.865   | ±0.287 |                      | 0.755              | ±0.179 |                      |
| Mean change           | 0.006              | ±0.081 | 0.042   | ±0.139 | 0.171                | -0.055             | ±0.110 | <0.001               |

† P-value by Dunnett-Hsu's Multiple Comparisons of ANCOVA

Values are mean±SD. Comparisons of IMTs during treatment with baseline values were performed by ANCOVA adjusted for age, sex, stroke subtype, location, previous stroke, hypertension, diabetes, hyperlipidemia, current smoking, statin, body mass index, glycated hemoglobin, total cholesterol, HDL cholesterol, triglyceride, LDL cholesterol, and interval.

**Supplementary Fig 1** The image capturing procedure of carotid IMT at baseline (a) and follow-up (b) and IMT measurement by using the semi-automated software, Intima Scope (c).

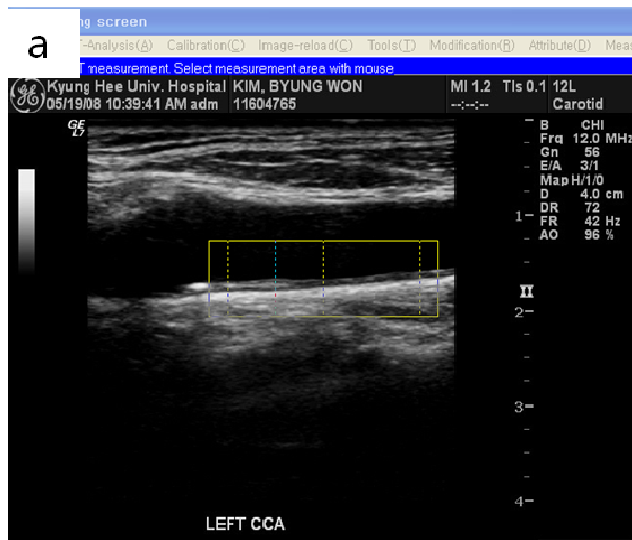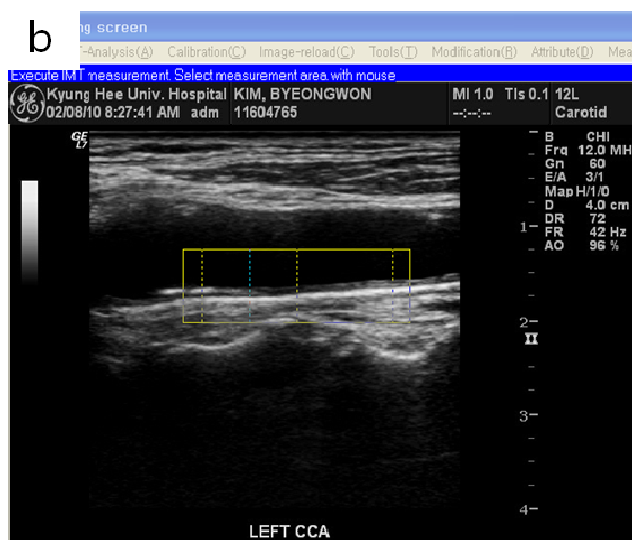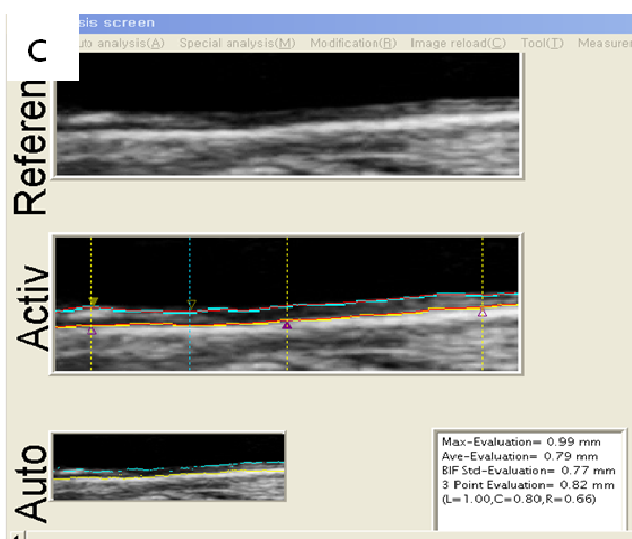

Supplement: MOESM1 [file 8457846]
